# Supplementary material for: The positive impacts of early-life education on cognition, leisure activity, and brain structure in healthy aging
Source: PubMed Central journal article supplement (PMC6682517; doi:10.18632/aging.102088), 2019-07-17
Supplement: aging-11-102088-s001.pdf [file aging-11-102088-s001.pdf]

**SUPPLEMENTARY FIGURES**

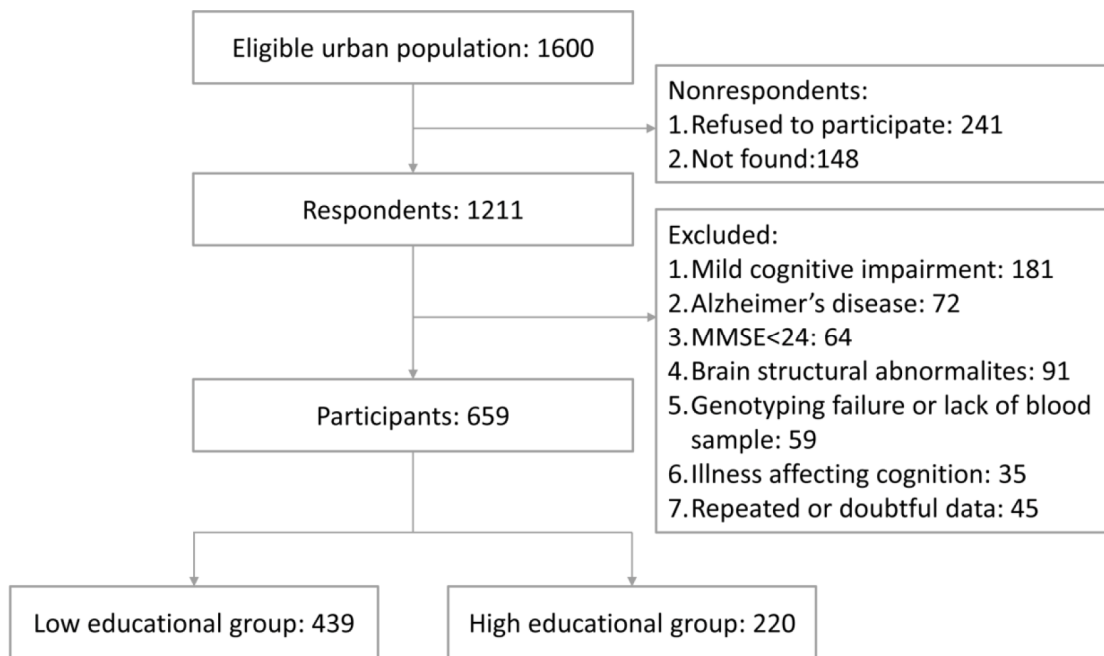

**Supplementary Figure 1. A flow diagram of the study population.**

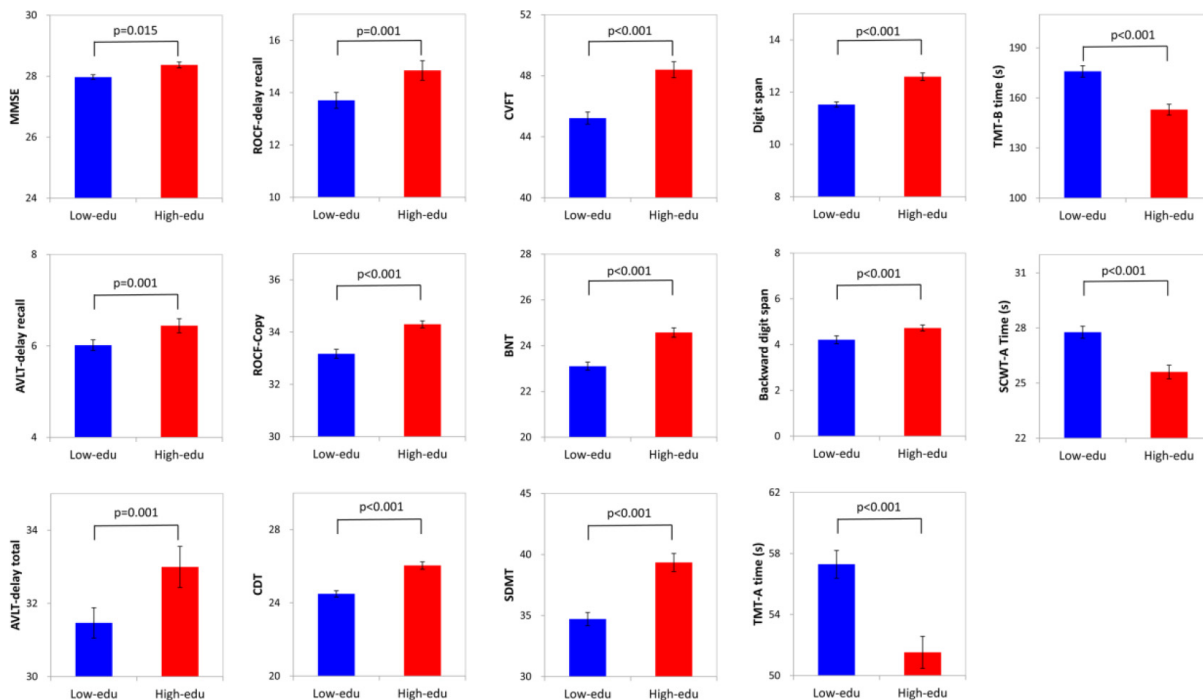

**Supplementary Figure 2. The main effect of education on cognitive performance.** Significant group differences of the cognitive tests between the low and high education groups. Error bars represent the standard error. MMSE=Mini-Mental Status Examination; AVLT=Auditory Verbal Learning Test; ROCF=Rey-Osterrieth Complex Figure test; CDT=Clock-Drawing Test; CVFT=Category Verbal Fluency Test; BNT=Boston Naming Test; SDMT=Symbol Digit Modalities Test; SCWT=Stroop Color and Word Test; TMT=Trail Making Test.

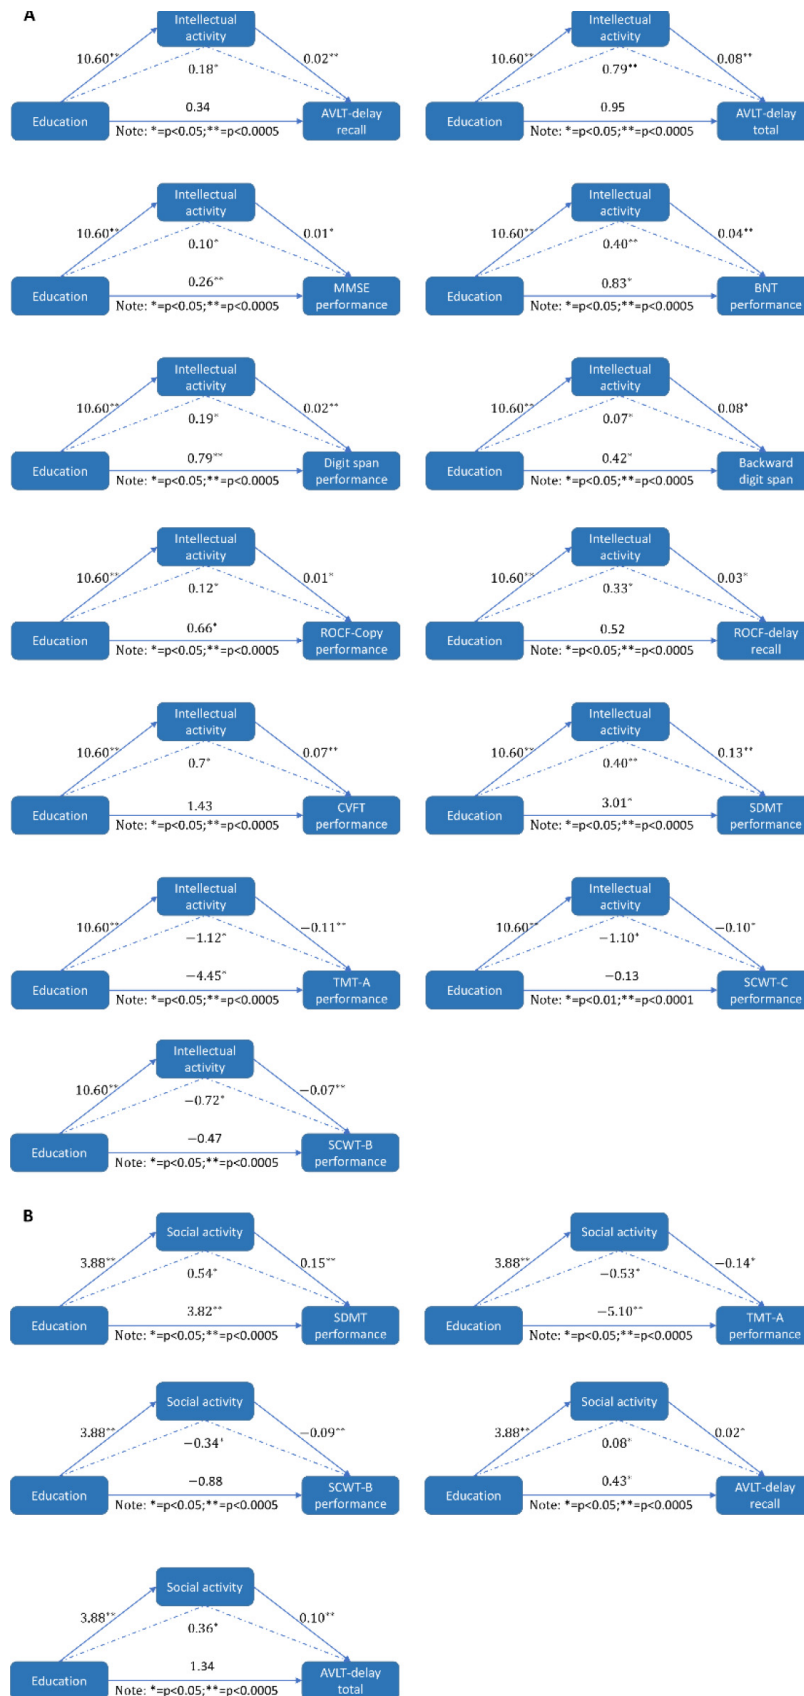

**Supplementary Figure 3. The mediation model. (A)** The mediation effect of intellectual activity education on multiple cognitive domains. **(B)** Mediating effect of social activity on the association between educational levels and memory, attention and executive function.

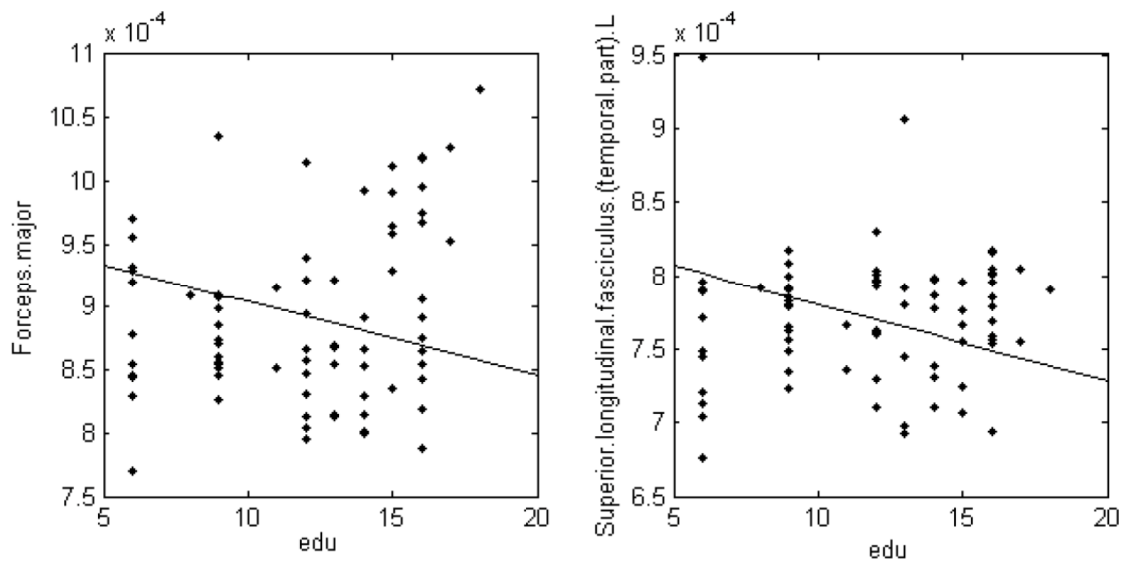

**Supplementary Figure 4. Scatterplots showing the relationship between years of education and the MD values of the forceps major and the SLF.temporal part. MD=mean diffusivity; SLF=superior longitudinal fasciculus.**
